# Supplementary material for: A novel one-step synthesis of gold nanoparticles in an alginate gel matrix by solution plasma sputtering
Source: Royal Society of Chemistry journal article supplement (doi:10.1039/c3ra45029e), 2013-11-20
Supplement: c3ra45029e.pdf [file c3ra45029e.pdf]

## Supplementary Information

### **A novel one-step synthesis of gold nanoparticles in an alginate gel matrix by solution plasma sputtering**

**Anyarat Watthanaphanit,<sup>\*a,b</sup> Gasidit Panomsuwan<sup>c</sup> and Nagahiro Saito<sup>a,b</sup>**

<sup>a</sup> *Green Mobility Collaborative Research Center, Nagoya University, Nagoya 464-8603, Japan.*

<sup>b</sup> *Department of Materials, Physics and Energy Engineering, Graduate School of Engineering, Nagoya University, Nagoya 464-8603, Japan*

<sup>c</sup> *Department of Materials Science and Engineering, Faculty of Engineering, Shibaura Institute of Technology, Tokyo 135-8548, Japan*

*Tel: and Fax: +81-52-789-2796; E-mail: anyarat@rd.numse.nagoya-u.ac.jp*

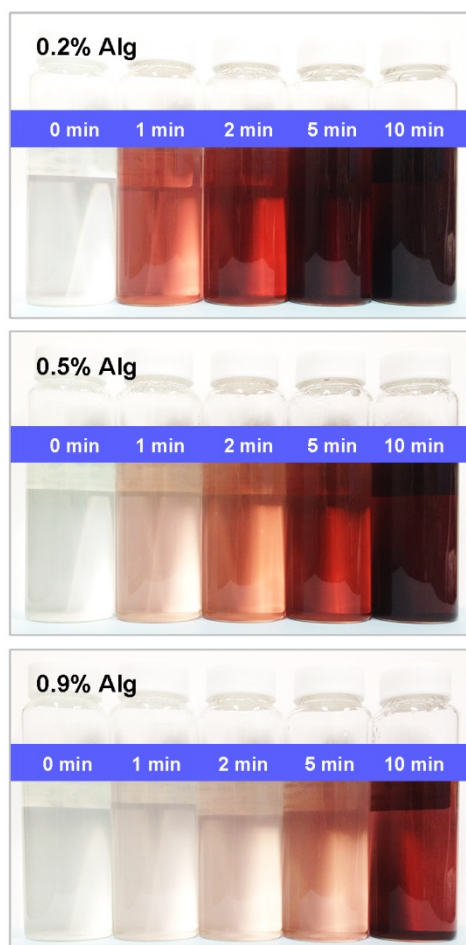

**Fig. S1** AuNPs–alginate aqueous suspensions prepared from alginate solution of different concentrations and SPS discharge times.

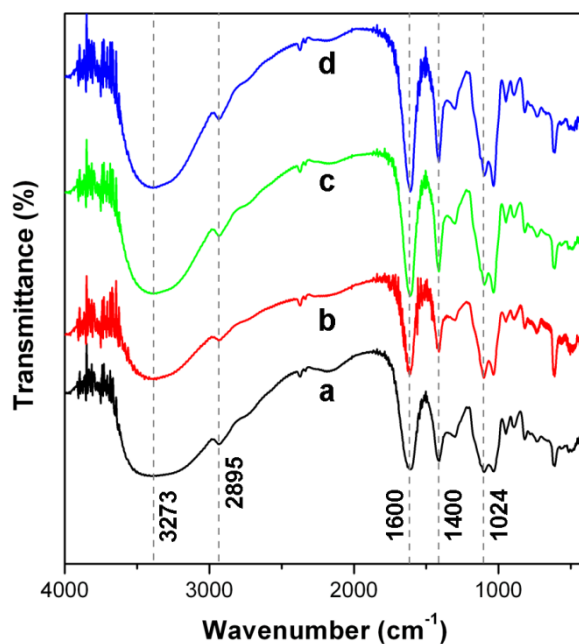

**Fig. S2** FTIR spectra of (a) sodium alginate aqueous solution and AuNPs–alginate aqueous suspensions produced in (b) 0.2, (c) 0.5, and (d) 0.9 %w/v alginate solutions (discharge time = 10 min).

**Table S1** Assignment of FTIR peaks appearing in Fig.2

| Wavenumber (cm <sup>-1</sup> ) | Peak assignment                           |
|--------------------------------|-------------------------------------------|
| 3273                           | O–H stretching                            |
| 2895                           | C–H stretching                            |
| 1600                           | Asymmetric stretching of COO <sup>-</sup> |
| 1400                           | Symmetric stretching of COO <sup>-</sup>  |
| 1024                           | C–O–C bending                             |
